# Supplementary material for: Development of Osteoarthritis in Adults With Type 2 Diabetes Treated With Metformin vs a Sulfonylurea
Source: PubMed Central journal article supplement (PMC10028483; doi:10.1001/jamanetworkopen.2023.3646), 2023-03-20
Supplement: jamanetwopen-e233646-s002.pdf [file jamanetwopen-e233646-s002.pdf]

## Data Sharing Statement

Baker. Development of Osteoarthritis in Adults With Type 2 Diabetes Treated With Metformin vs a Sulfonylurea. *JAMA Netw Open*. Published March 20, 2023.  
doi:10.1001/jamanetworkopen.2023.3646

### Data

**Data available:** No
